# Supplementary material for: Inhibition of Lipid Accumulation in NAFLD Liver by Extract of Rosa laevigata Fruit Extract through Activation of the PI3K-AKT Signaling Pathway
Source: Research Square preprint supplement (doi:10.21203/rs.3.rs-6926759/v1), 2025-08-01
Supplement: Supplementary file 1 [file c3596625fd6da64189355b34.docx]

# Supplementary data


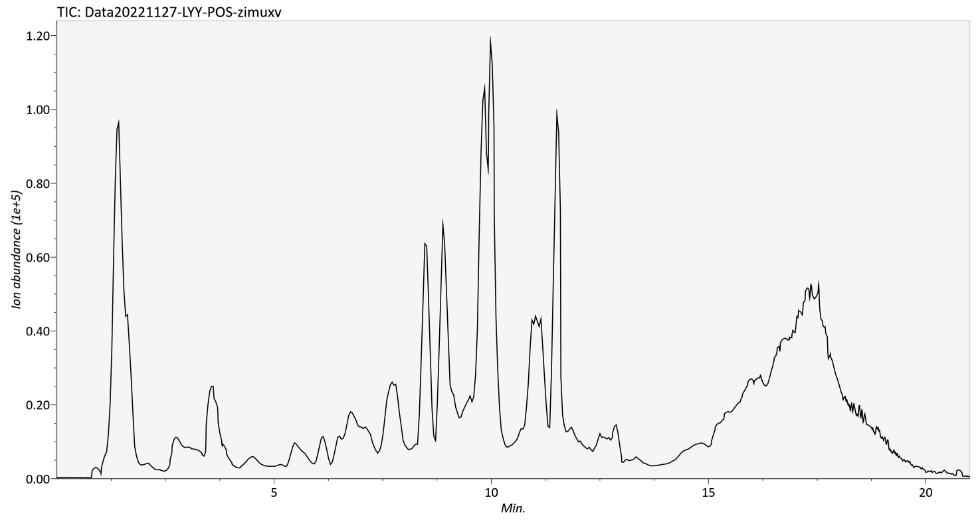


**A**


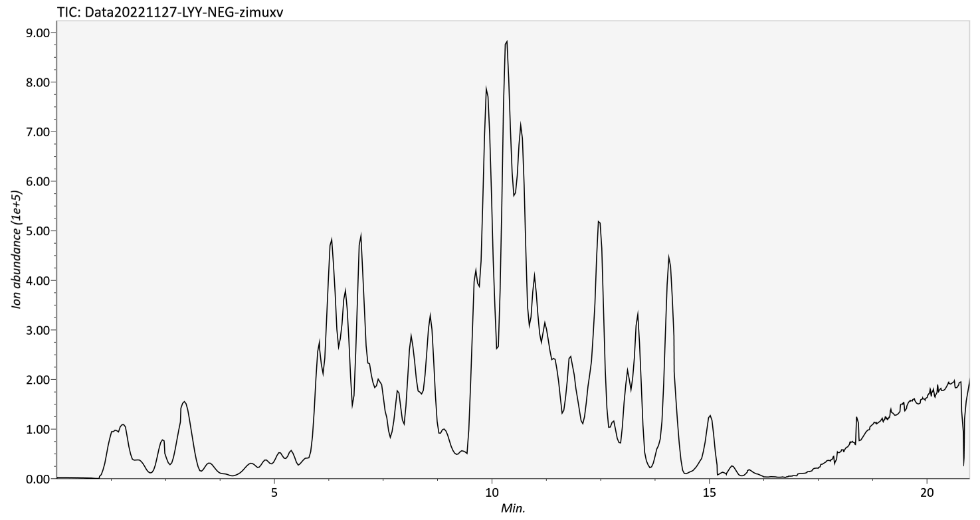


**B**

**Figure S1** (A) Total ion chromatogram of RLF extract in positive ion mode;(B) Total ion chromatogram of RLF extract in negative ion mode.

Attached Table S1 Identification of chemical constituents of RLF extract

| No. | Rt(min) | Experimental(m/z) | Fragments(m/z) | Formula | Identification | Ontology | Content (‰) |
| --- | --- | --- | --- | --- | --- | --- | --- |
| 1 | 0.121 | 283.2643 [M-H]- | 173.1568，254.0317 | C30H48O5 | stearic acid | organic acids | 0.4 |
| 2 | 0.143 | 339.3269[M-H]- | 337.3147，101.2462 | C22H44O2 | Docosanoate | organic acids | 0.7 |
| 3 | 0.146 | 281.2486 [M-H]- | 281.2495，256.2398 | C18H34O2 | oleic acid | organic acids | 0.6 |
| 4 | 0.164 | 311.2956[M-H]- | 293.2847，191.9993 | C20H40O2 | Arachic acid | organic acids | 0.8 |
| 5 | 0.218 | 377.1456[M+H]+ | 243.0883，172.0877 | C17H20N4O6 | riboflavin | flavonoids | 0.2 |
| 6 | 0.354 | 255.2335 [M-H]- | 203.2024，195.2303 | C16H32O2 | palmitic acid | organic acids | 0.3 |
| 7 | 0.660 | 173.0422 [M+H]+ | 170.0334，154.9666 | C5H10O5 | aldehydo-L-arabinose | monosaccharides | 1.1 |
| 8 | 1.2406 | 293.0973 [M-H]- | 293.09317 | C17H14N2O3 | cyclopenin | flavonoids | 1.3 |
| 9 | 1.273 | 179.0582 [M-H]- | 179.0574 | C7H8N4O2 | Theophylline | flavonoids | 1.6 |
| 10 | 1.280 | 357.1017 [M-H]- | 357.09799 | C19H18O7 | Corymbosin | organic acids | 1.4 |
| 11 | 1.392 | 132.9873[M-H]- | 114.9543，73.1425 | C4H6O5 | malic acid | organic acids | 4.3 |
| 12 | 1.585 | 296.978[M+H]+ | 237.274，218.185 | C6H12O5 | alpha-L-Rhamnose | monosaccharides | 2.3 |
| 13 | 1.665 | 99.0100[M+H]+ | 55.0271，68.0728 | C6H12O6 | beta-D-galactose | monosaccharides | 1.2 |
| 14 | 2.065 | 415.393[M+H]+ | 116.053，119.085 | C29H50O | beta-sitosterol | flavonoids | 1.4 |
| 15 | 2.078 | 191.0197[M-H]- | 41.0034，57.0341 | C6H8O7 | citric acid | organic acids | 0.4 |
| 16 | 2.545 | 194.065[M-H]- | 153.959184，148.971730 | C6H8O6 | Ascorbic Acid | flavonoids | 4.6 |
| 17 | 2.546 | 455.3517[M-H]- | 456.3554，457.3596 | C30H48O3 | oleanolic acid | terpenoids | 0.2 |
| 18 | 2.546 | 456.3185[M-H]- | 456.3554，457.3596 | C36H58O10 | arjunetin | phenolics | 0.4 |
| 19 | 2.67935 | 169.0145 [M+H]- | 169.01425，118.1228 | C20H25NO3 | Gallic acid | phenolics | 0.6 |
| 20 | 3.038 | 271.0601 [M+H]+ | 158.0122，153.0194 | C15H10O5 | apigenin | flavonoids | 5.5 |
| 21 | 3.792 | 287.0549[M+H]+ | 289.0606，165.0191 | C15H10O6 | Kaempferol | flavonoids | 6.1 |
| 22 | 4.891 | 153.01881[M-H]- | 109.0297，109.0297 | C7H6O4 | protocatechuic acid | phenolics | 5.8 |
| 23 | 6.658 | 279.2319[M+H]+ | 261.2196，81.0695 | C18H30O2 | linolenic acid | organic acids | 1.2 |
| 24 | 7.057 | 309.2799[M-H]- | 293.2744，275.3109 | C20H38O2 | gondoic acid | organic acids | 1.5 |
| 25 | 7.095 | 471.3474 [M-H]- | 471.34799 | C30H48O4 | Pomolic acid | saponins | 0.4 |
| 26 | 7.095 | 300.9978 [M-H]- | 300.9990 | C14H6O8 | Ellagic Acid | phenolics | 5.2 |
| 27 | 7.177 | 130.0662 [M-H]- | 103.78902 | C9H9N | 3-Methylbenzyl cyanide | flavonoids | 0.8 |
| 28 | 7.214 | 221.0421[M+H]+ | 183，165 | C6H14O6 | Mannitol | monosaccharides | 2.7 |
| 29 | 7.525 | 643.3414 [M+H]+ | 643.33002 | C32H50O13 | Rubusoside | saponins | 0.2 |
| 30 | 7.665 | 179.0551 [M-H]- | 181.0721，124.0492 | C6H12O6 | D(+)-Glucose | monosaccharides | 0.5 |
| 31 | 7.843 | 473.3625[M+H]+ | 409.34772，410.36133 | C30H48O4 | 2α,3α-dihydroxyolean-12-en-28-oic acid | terpenoids | 1.6 |
| 32 | 8.074 | 301.0354 [M-H]- | 65.0033，65.0448 | C15H10O7 | quercetin | flavonoids | 1.2 |
| 33 | 9.173 | 593.1286 [M-H]- | 595.1412，285.0425 | C30H26O13 | Tiliroside | flavonoids | 6.6 |
| 34 | 9.771 | 473.3625 [M+H]+ | 437.32886，410.36133 | C30H48O4 | Maslinic acid | terpenoids | 5.8 |
| 35 | 10.309 | 103.9998 [M-H]- | 216.9578，217.9535 | C5H10O5 | Alpha-d-xylopyranose | monosaccharides | 1.4 |
| 36 | 10.667 | 527.3419 [M+H]+ | 527.34003 | C30H48O6 | 19a-hydroxyasiatic acid | terpenoids | 5.3 |
| 37 | 11.820 | 302.3085 [M+H]+ | 302.3123 | C18H39NO2 | Dihydrosphingosine | ceramide | 0.7 |
| 38 | 12.031 | 253.2643 [M-H]- | 173.1458，244.0613 | C30H48O6 | Myrianthic acid | terpenoids | 0.9 |
| 39 | 12.031 | 487.3403 [M-H]- | 487.3429 | C17H14N2O3 | Asiatic Acid | flavonoids | 1.2 |
| 40 | 12.031 | 487.3403 [M-H]- | 487.3429 | C30H48O5 | Euscaphic acid 3,4-monoacetonide | terpenoids | 0.4 |
| 41 | 15.034 | 471.3474 [M-H]- | 471.34799 | C30H48O4 | 2α,3β-dihydroxylup-20(29)-en-28-oic acid | terpenoids | 1.2 |
| 42 | 15.756 | 549.3512 [M-H]- | 504.3478，505.3511 | C30H48O6 | 1α,2α,3β,19α-tetrahydroxyurs-12-en-28-oic acid | terpenoids | 2.5 |
| 43 | 17.113 | 309.2788[M+H]+ | 263.3355，245.3234 | C20H36O2 | Mandenol | organic acids | 5.7 |
| 44 | 17.652 | 455.3521[M-H]- | 453.3362，454.3409 | C30H48O3 | ursolic acid | terpenoids | 5.3 |
| 45 | 19.474 | 487.3403 [M-H]- | 487.3429 | C30H48O5 | Tormentic acid | organic acids | 2.2 |
| 46 | 22.348 | 471.3573 [M-H]- | 407.3367，472.3577 | C30H48O4 | Hederagenol | saponins | 1.4 |
| 47 | 23.465 | 471.3524 [M-H]- | 473.3567，473.3589 | C30H48O4 | Glucosol | saponins | 2.1 |
| 48 | 28.374 | 455.3525 [M-H]- | 454.3409，333.13248 | C30H48O3 | Methyl 3beta-hydroxyurs-12-en-28-oate | terpenoids | 0.8 |

Attached Table S2:244 target proteins associated with Target protein name

| Symbol | Target protein name | Symbol | Target protein name |
| --- | --- | --- | --- |
| PTGS1 | Prostaglandin G/H synthase 1 | CREB1 | Cyclic AMP-responsive element-binding protein 1 |
| PTGS2 | Prostaglandin G/H synthase 2 | PTGER3 | Prostaglandin E2 receptor EP3 subtype |
| ADH1C | Alcohol dehydrogenase 1C | MCL1 | Induced myeloid leukemia cell differentiation protein Mcl-1 |
| PRSS3 | Trypsin-3 | ATF2 | Cyclic AMP-dependent transcription factor ATF-2 |
| PRKCA | Protein kinase C alpha type | CSF2 | Granulocyte-macrophage colony-stimulating factor |
| PRKCB | Protein kinase C beta type | PECAM1 | Platelet endothelial cell adhesion molecule |
| PRKCG | Protein kinase C gamma type | MAPK8IP2 | C-Jun-amino-terminal kinase-interacting protein 2 |
| PRKCZ | Protein kinase C zeta type | BIRC5 | Baculoviral IAP repeat-containing protein 5 |
| F7 | Coagulation factor VII | PTPN6 | Tyrosine-protein phosphatase non-receptor type 6 |
| NCOA2 | Nuclear receptor coactivator 2 | GAP43 | Neuromodulin |
| CHRM3 | Muscarinic acetylcholine receptor M3 | DUOX2 | Dual oxidase 2 |
| CHRM1 | Muscarinic acetylcholine receptor M1 | PTPN1 | Tyrosine-protein phosphatase non-receptor type 1 |
| ADRB1 | Beta-1 adrenergic receptor | LITAF | Lipopolysaccharide-induced tumor necrosis factor-alpha factor |
| ADRA2A | Alpha-2A adrenergic receptor | CCND2 | G1/S-specific cyclin-D2 |
| ADRA2C | Alpha-2C adrenergic receptor | FASLG | Tumor necrosis factor ligand superfamily member 6 |
| ADRA1A | Alpha-1A adrenergic receptor | CASP1 | Caspase-1 |
| ADRA1B | Alpha-1B adrenergic receptor | ENPP7 | Ectonucleotide pyrophosphatase/phosphodiesterase family member 7 |
| SLC6A3 | Sodium-dependent dopamine transporter | ADH1A | Alcohol dehydrogenase 1A |
| ADRB2 | Beta-2 adrenergic receptor | CAT | Catalase |
| SLC6A4 | Sodium-dependent serotonin transporter | TEP1 | Telomerase protein component 1 |
| LTA4H | Leukotriene A-4 hydrolase | EDN1 | Endothelin-1 |
| SRC | Proto-oncogene tyrosine-protein kinase SRC | ERBB2 | Receptor tyrosine-protein kinase erbB-2 |
| CTSD | Cathepsin D | LPL | Lipoprotein lipase |
| GABRA1 | Gamma-aminobutyric acid receptor subunit alpha-1 | SERPINE1 | Plasminogen activator inhibitor 1 |
| GRIA2 | Glutamate receptor 2 | BDNF | Brain-derived neurotrophic factor |
| CPB1 | Carboxypeptidase B | HMGCR | 3-hydroxy-3-methylglutaryl-coenzyme A reductase |
| TPI1 | Triosephosphate isomerase | MPO | Myeloperoxidase |
| HDC | Histidine decarboxylase | PPARA | Peroxisome proliferator-activated receptor alpha |
| ABAT | 4-aminobutyrate aminotransferase, mitochondrial | PPARD | Peroxisome proliferator-activated receptor delta |
| GOT1 | Aspartate aminotransferase, cytoplasmic | CRP | C-reactive protein |
| BCHE | Cholinesterase | INS | Insulin |
| GOT2 | Aspartate aminotransferase, mitochondrial | PLG | Plasminogen |
| P3H3 | Prolyl 3-hydroxylase 3 | FABP1 | Fatty acid-binding protein, liver |
| ADSS1 | Adenylosuccinate synthetase isozyme 1 | RBP2 | Retinol-binding protein 2 |
| ME2 | NAD-dependent malic enzyme, mitochondrial | ENPEP | Glutamyl aminopeptidase |
| GLUD1 | Glutamate dehydrogenase 1, mitochondrial | SOAT1 | Sterol O-acyltransferase 1 |
| ARG1 | Arginase-1 | CCK | Cholecystokinin |
| ME3 | NADP-dependent malic enzyme, mitochondrial | CITED1 | Cbp/p300-interacting transactivator 1 |
| GPT | Alanine aminotransferase 1 | NTRK2 | BDNF/NT-3 growth factors receptor |
| CASP9 | Caspase-9 | PDX1 | Pancreas/duodenum homeobox protein 1 |
| CASP3 | Caspase-3 | SLC2A2 | Solute carrier family 2, facilitated glucose transporter member 2 |
| HMOX1 | Heme oxygenase 1 | PAM | Peptidyl-glycine alpha-amidating monooxygenase |
| ICAM1 | Intercellular adhesion molecule 1 | CETP | Cholesteryl ester transfer protein |
| AMY2A | Pancreatic alpha-amylase | PYY | Peptide YY |
| PGR | Progesterone receptor | DNPEP | Aspartyl aminopeptidase |
| KCNH2 | Potassium voltage-gated channel subfamily H member 2 | RHO | Rhodopsin |
| SCN5A | Sodium channel protein type 5 subunit alpha | IL10 | Interleukin-10 |
| HTR3A | 5-hydroxytryptamine receptor 3A | PCYT1A | Choline-phosphate cytidylyltransferase A |
| RXRA | Retinoic acid receptor RXR-alpha | EIF6 | Eukaryotic translation initiation factor 6 |
| ADRA1D | Alpha-1D adrenergic receptor | RB1 | Retinoblastoma-associated protein |
| CHRM4 | Muscarinic acetylcholine receptor M4 | EEF1E1 | Eukaryotic translation elongation factor 1 epsilon-1 |
| CHRM2 | Muscarinic acetylcholine receptor M2 | ODC1 | Ornithine decarboxylase |
| CHRNA2 | Neuronal acetylcholine receptor subunit alpha-2 | MDM2 | E3 ubiquitin-protein ligase Mdm2 |
| OPRM1 | Mu-type opioid receptor | HIF1A | Hypoxia-inducible factor 1-alpha |
| BCL2 | Apoptosis regulator Bcl-2 | IGF1R | Insulin-like growth factor 1 receptor |
| BAX | Apoptosis regulator BAX | RUNX1T1 | Protein CBFA2T1 |
| CASP8 | Caspase-8 | ACACA | Acetyl-CoA carboxylase 1 |
| PON1 | Serum paraoxonase/arylesterase 1 | IL2 | Interleukin-2 |
| MAP2 | Microtubule-associated protein 2 | CCNB1 | G2/mitotic-specific cyclin-B1 |
| NOS2 | Nitric oxide synthase, inducible | IFNG | Interferon gamma |
| AR | Androgen receptor | IL4 | Interleukin-4 |
| ACHE | Acetylcholinesterase | IKBKG | NF-kappa-B essential modulator |
| SLC6A2 | Sodium-dependent noradrenaline transporter | CD40LG | CD40 ligand |
| RELA | Transcription factor p65 | CYCS | Cytochrome c |
| IKBKB | Inhibitor of nuclear factor kappa-B kinase subunit beta | CFLAR | CASP8 and FADD-like apoptosis regulator |
| AKT1 | RAC-alpha serine/threonine-protein kinase | AAGAB | Alpha- and gamma-adaptin-binding protein p34 |
| TNF | Tumor necrosis factor | FCER2 | Low affinity immunoglobulin epsilon Fc receptor |
| AHSA1 | Activator of 90 kDa heat shock protein ATPase homolog 1 | IL13 | Interleukin-13 |
| MAPK8 | Mitogen-activated protein kinase 8 | MS4A2 | High affinity immunoglobulin epsilon receptor subunit beta |
| XDH | Xanthine dehydrogenase/oxidase | ALPI | Intestinal-type alkaline phosphatase |
| MMP1 | Interstitial collagenase | PSME3 | Proteasome activator complex subunit 3 |
| STAT1 | Signal transducer and activator of transcription 1-alpha/beta | APC | Adenomatous polyposis coli protein |
| PPARG | Peroxisome proliferator-activated receptor gamma | TRPM2 | Transient receptor potential cation channel subfamily M member 2 |
| CYP3A4 | Cytochrome P450 3A4 | SLC5A5 | Sodium/iodide cotransporter |
| CYP1A2 | Cytochrome P450 1A2 | FXYD2 | Sodium/potassium-transporting ATPase subunit gamma |
| CYP1A1 | Cytochrome P450 1A1 | ALG5 | Dolichyl-phosphate beta-glucosyltransferase |
| SELE | E-selectin | SP1 | Transcription factor Sp1 |
| VCAM1 | Vascular cell adhesion protein 1 | NR3C1 | Glucocorticoid receptor |
| NR1I2 | Nuclear receptor subfamily 1 group I member 2 | CHRM5 | Muscarinic acetylcholine receptor M5 |
| CYP1B1 | Cytochrome P450 1B1 | OPRD1 | Delta-type opioid receptor |
| HAS2 | Hyaluronan synthase 2 | ADRA2B | Alpha-2B adrenergic receptor |
| GSTP1 | Glutathione S-transferase P | EGFR | Epidermal growth factor receptor |
| AHR | Aryl hydrocarbon receptor | MAPK1 | Mitogen-activated protein kinase 1 |
| PSMD3 | 26S proteasome non-ATPase regulatory subunit 3 | EGF | Pro-epidermal growth factor |
| SLC2A4 | Solute carrier family 2, facilitated glucose transporter member 4 | ELK1 | ETS domain-containing protein Elk-1 |
| NR1I3 | Nuclear receptor subfamily 1 group I member 3 | POR | NADPH--cytochrome P450 reductase |
| INSR | Insulin receptor | TOP1 | DNA topoisomerase 1 |
| DIO1 | Type I iodothyronine deiodinase | RAF1 | RAF proto-oncogene serine/threonine-protein kinase |
| GSTM1 | Glutathione S-transferase Mu 1 | CAV1 | Caveolin-1 |
| GSTM2 | Glutathione S-transferase Mu 2 | F3 | Tissue factor |
| AKR1C3 | Aldo-keto reductase family 1 member C3 | GJA1 | Gap junction alpha-1 protein |
| SLPI | Antileukoproteinase | CCL2 | C-C motif chemokine 2 |
| MAN2A1 | Alpha-mannosidase 2 | CXCL8 | Interleukin-8 |
| RXRG | Retinoic acid receptor RXR-gamma | HSPB1 | Heat shock protein beta-1 |
| TRPV1 | Transient receptor potential cation channel subfamily V member 1 | PLAT | Tissue-type plasminogen activator |
| PCNA | Proliferating cell nuclear antigen | THBD | Thrombomodulin |
| MYC | Myc proto-oncogene protein | IL1A | Interleukin-1 alpha |
| HNF4A | Hepatocyte nuclear factor 4-alpha | TOP2A | DNA topoisomerase 2-alpha |
| HNF1A | Hepatocyte nuclear factor 1-alpha | NCF1 | Neutrophil cytosol factor 1 |
| ACTB | Actin, cytoplasmic 1 | NFE2L2 | Nuclear factor erythroid 2-related factor 2 |
| TRIM26 | Tripartite motif-containing protein 26 | CXCL11 | C-X-C motif chemokine 11 |
| PYGM | Glycogen phosphorylase, muscle form | CXCL2 | C-X-C motif chemokine 2 |
| LTF | Lactotransferrin | DCAF5 | DDB1- and CUL4-associated factor 5 |
| GLB1 | Beta-galactosidase | CHEK2 | Serine/threonine-protein kinase Chk2 |
| PYGL | Glycogen phosphorylase, liver form | CLDN4 | Claudin-4 |
| ACP3 | Prostatic acid phosphatase | HSF1 | Heat shock factor protein 1 |
| MAN1B1 | Endoplasmic reticulum mannosyl-oligosaccharide 1,2-alpha-mannosidase | CXCL10 | C-X-C motif chemokine 10 |
| PLAU | Urokinase-type plasminogen activator | CHUK | Inhibitor of nuclear factor kappa-B kinase subunit alpha |
| CTSB | Cathepsin B | SPP1 | Osteopontin |
| STAT3 | Signal transducer and activator of transcription 3 | RUNX2 | Runt-related transcription factor 2 |
| CCND1 | G1/S-specific cyclin-D1 | RASSF1 | Ras association domain-containing protein 1 |
| BCL2L1 | Bcl-2-like protein 1 | E2F1 | Transcription factor E2F1 |
| CDKN1A | Cyclin-dependent kinase inhibitor 1 | E2F2 | Transcription factor E2F2 |
| MMP2 | 72 kDa type IV collagenase | IGFBP3 | Insulin-like growth factor-binding protein 3 |
| MMP9 | Matrix metalloproteinase-9 | IGF2 | Insulin-like growth factor II |
| IL6 | Interleukin-6 | IRF1 | Interferon regulatory factor 1 |
| TP53 | Cellular tumor antigen p53 | ERBB3 | Receptor tyrosine-protein kinase erbB-3 |
| NFKBIA | NF-kappa-B inhibitor alpha | PCOLCE | Procollagen C-endopeptidase enhancer 1 |
| FASN | Fatty acid synthase | NPEPPS | Puromycin-sensitive aminopeptidase |
| MMP3 | Stromelysin-1 | HK2 | Hexokinase-2 |
| MMP10 | Stromelysin-2 | NKX3-1 | Homeobox protein Nkx-3.1 |
| IL1B | Interleukin-1 beta | RASA1 | Ras GTPase-activating protein 1 |

Attached Table S3 Information on target proteins associated with RLF extract and NAFLD

| Symbol | Target protein name | Degree value |
| --- | --- | --- |
| AKT1 | RAC-alpha serine/threonine-protein kinase | 99 |
| INS | Insulin | 98 |
| TNF | Tumor necrosis factor | 96 |
| IL6 | Interleukin-6 | 95 |
| TP53 | Cellular tumor antigen p53 | 92 |
| IL1B | Interleukin-1 beta | 92 |
| ACTB | Actin, cytoplasmic 1 | 89 |
| PPARG | Peroxisome proliferator-activated receptor gamma | 83 |
| STAT3 | Signal transducer and activator of transcription 3 | 83 |
| CASP3 | Caspase-3 | 82 |
| EGFR | Epidermal growth factor receptor | 81 |
| PTGS2 | Prostaglandin G/H synthase 2 | 80 |
| HIF1A | Hypoxia-inducible factor 1-alpha | 80 |
| BCL2 | Apoptosis regulator Bcl-2 | 79 |
| MMP9 | Matrix metalloproteinase-9 | 79 |
| MYC | Myc proto-oncogene protein | 75 |
| CCL2 | C-C motif chemokine 2 | 72 |
| IFNG | Interferon gamma | 71 |
| CXCL8 | Interleukin-8 | 71 |
| IL10 | Interleukin-10 | 69 |
| IL1A | Interleukin-1 alpha | 67 |
| EGF | Pro-epidermal growth factor | 67 |
| HMOX1 | Heme oxygenase 1 | 66 |
| CYCS | Cytochrome c | 65 |
| ICAM1 | Intercellular adhesion molecule 1 | 65 |
| MMP2 | 72 kDa type IV collagenase | 63 |
| CCND1 | G1/S-specific cyclin-D1 | 63 |
| PPARA | Peroxisome proliferator-activated receptor alpha | 61 |
| CREB1 | Cyclic AMP-responsive element-binding protein 1 | 61 |
| STAT1 | Signal transducer and activator of transcription 1-alpha/beta | 58 |
| IL4 | Interleukin-4 | 57 |
| VCAM1 | Vascular cell adhesion protein 1 | 57 |
| GPT | Alanine aminotransferase 1 | 56 |
| SERPINE1 | Plasminogen activator inhibitor 1 | 56 |
| CASP8 | Caspase-8 | 56 |
| NFE2L2 | Nuclear factor erythroid 2-related factor 2 | 55 |
| RELA | Transcription factor p65 | 55 |
| CRP | C-reactive protein | 54 |
| CDKN1A | Cyclin-dependent kinase inhibitor 1 | 52 |
| BDNF | Brain-derived neurotrophic factor | 51 |
| CASP9 | Caspase-9 | 51 |
| MAPK8 | Mitogen-activated protein kinase 8 | 51 |
| CAV1 | Caveolin-1 | 48 |
| CXCL10 | C-X-C motif chemokine 10 | 47 |
| IKBKB | Inhibitor of nuclear factor kappa-B kinase subunit beta | 47 |
| IGF1R | Insulin-like growth factor 1 receptor | 47 |
| CCK | Cholecystokinin | 46 |
| MDM2 | E3 ubiquitin-protein ligase Mdm2 | 46 |
| SPP1 | Osteopontin | 46 |
| MPO | Myeloperoxidase | 45 |
| IL13 | Interleukin-13 | 43 |
| FASLG | Tumor necrosis factor ligand superfamily member 6 | 43 |
| PPARD | Peroxisome proliferator-activated receptor delta | 42 |
| SLC2A4 | Solute carrier family 2,facilitated glucose transporter member4 | 42 |
| CHUK | Inhibitor of nuclear factor kappa-B kinase subunit alpha | 42 |
| IGFBP3 | Insulin-like growth factor-binding protein 3 | 41 |
| NOS2 | Nitric oxide synthase, inducible | 40 |
| SELE | E-selectin | 40 |
| HMGCR | 3-hydroxy-3-methylglutaryl-coenzyme A reductase | 39 |
| ARG1 | Arginase-1 | 39 |
| MMP1 | Interstitial collagenase | 39 |
| AR | Androgen receptor | 39 |
| IRF1 | Interferon regulatory factor 1 | 38 |
| SP1 | Transcription factor Sp1 | 38 |
| PLAU | Urokinase-type plasminogen activator | 38 |
| CYP3A4 | Cytochrome P450 3A4 | 36 |
| XDH | Xanthine dehydrogenase/oxidase | 36 |
| PRKCA | Protein kinase C alpha type | 36 |
| CD40LG | CD40 ligand | 36 |
| HNF4A | Hepatocyte nuclear factor 4-alpha | 35 |
| E2F1 | Transcription factor E2F1 | 35 |
| FASN | Fatty acid synthase | 34 |
| CFLAR | CASP8 and FADD-like apoptosis regulator | 34 |
| CTSB | Cathepsin B | 33 |
| CYP1A1 | Cytochrome P450 1A1 | 33 |
| HSPB1 | Heat shock protein beta-1 | 32 |
| F3 | Tissue factor | 29 |
| RXRA | Retinoic acid receptor RXR-alpha | 29 |
| GOT2 | Aspartate aminotransferase, mitochondrial | 28 |
| BAX | Apoptosis regulator BAX | 27 |
| ADRB2 | Beta-2 adrenergic receptor | 26 |
| THBD | Thrombomodulin | 25 |
| LPL | Lipoprotein lipase | 24 |
| PON1 | Serum paraoxonase/arylesterase 1 | 24 |
| CTSD | Cathepsin D | 24 |
| ACHE | Acetylcholinesterase | 23 |
| RB1 | Retinoblastoma-associated protein | 23 |
| NR1I2 | Nuclear receptor subfamily 1 group I member 2 | 23 |
| CYP1A2 | Cytochrome P450 1A2 | 22 |
| PTPN1 | Tyrosine-protein phosphatase non-receptor type 1 | 21 |
| GSTP1 | Glutathione S-transferase P | 21 |
| OPRM1 | Mu-type opioid receptor | 21 |
| INSR | Insulin receptor | 20 |
| HNF1A | Hepatocyte nuclear factor 1-alpha | 20 |
| ACACA | Acetyl-CoA carboxylase 1 | 19 |
| FABP1 | Fatty acid-binding protein, liver | 19 |
| BIRC5 | Baculoviral IAP repeat-containing protein 5 | 19 |
| RASA1 | Ras GTPase-activating protein 1 | 16 |
| BCHE | Cholinesterase | 16 |
| MMP10 | Stromelysin-2 | 15 |
| PRKCZ | Protein kinase C zeta type | 14 |
| GSTM1 | Glutathione S-transferase Mu 1 | 14 |
| SLC6A4 | Sodium-dependent serotonin transporter | 14 |
| SLC6A3 | Sodium-dependent dopamine transporter | 13 |
| NR1I3 | Nuclear receptor subfamily 1 group I member 3 | 11 |
| CETP | Cholesteryl ester transfer protein | 11 |
| SLPI | Antileukoproteinase | 11 |
| PYGL | Glycogen phosphorylase, liver form | 8 |
| E2F2 | Transcription factor E2F2 | 8 |
| HTR3A | 5-hydroxytryptamine receptor 3A | 7 |
| OPRD1 | Delta-type opioid receptor | 7 |
| AHR | Aryl hydrocarbon receptor | 7 |
| PCNA | Proliferating cell nuclear antigen | 7 |
| GLUD1 | Glutamate dehydrogenase 1, mitochondrial | 6 |
| ADRB1 | Beta-1 adrenergic receptor | 6 |
| GOT1 | Aspartate aminotransferase, cytoplasmic | 6 |
| LITAF | Lipopolysaccharide-induced tumor necrosis factor-alpha factor | 6 |
| RXRG | Retinoic acid receptor RXR-gamma | 6 |
| ADH1A | Alcohol dehydrogenase 1A | 4 |
| ADH1C | Alcohol dehydrogenase 1C | 4 |
| AHSA1 | Activator of 90 kDa heat shock protein ATPase homolog 1 | 3 |
| ELK1 | ETS domain-containing protein Elk-1 | 3 |
