# Supplementary material for: Inhibition of Lipid Accumulation in NAFLD Liver by Extract of Rosa laevigata Fruit Extract through Activation of the PI3K-AKT Signaling Pathway
Source: Research Square preprint supplement (doi:10.21203/rs.3.rs-6926759/v1), 2025-08-01
Supplement: Supplementary file 2 [file eb3669e6eef8926f25b03377.docx]

Highlights:

1. *Rosa laevigata* Fruit can be used to treat non-alcoholic fatty liver disease and reduce lipid accumulation in hepatocytes.

2.Extracts from *Rosa laevigata* Fruit exhibit antioxidant and lipid-lowering pharmacological activities.

3.Liquid chromatography-mass spectrometry combined with network pharmacology predicts key information regarding the pharmacological mechanisms of action.

4.Extracts from *Rosa laevigata* Fruit activate the PI3K-AKT signaling pathway.
